# Supplementary material for: Discovery of metabolic biomarkers for gestational diabetes mellitus in a Chinese population
Source: Nutr Metab (Lond). 2021 Aug 21;18:79. doi: 10.1186/s12986-021-00606-8 (PMC8379750; doi:10.1186/s12986-021-00606-8)
Supplement: Supplementary file 7 — Additional file 7. Table S4: Function enrichments of DEMs in the third trimester group. [file 12986_2021_606_MOESM7_ESM.xlsx]

## Sheet: SMPDB
	Total	Expected	Hits	Raw P	Holm P	FDR	Enriched_Compounds
Urea Cycle	29	1.02	6	0.000325	0.0318	0.0176	L-Alanine Oxoglutaric acid Pyruvic acid L-Arginine L-Glutamine Citrulline
Ammonia Recycling	32	1.12	6	0.000574	0.0557	0.0176	Glycine L-Histidine L-Serine Oxoglutaric acid Pyruvic acid L-Glutamine
Glycine and Serine Metabolism	59	2.07	8	0.000638	0.0612	0.0176	Glycine Guanidoacetic acid L-Alanine L-Serine Oxoglutaric acid Pyruvic acid L-Arginine L-Methionine
Valine, Leucine and Isoleucine Degradation	60	2.11	8	0.000718	0.0682	0.0176	Alpha-ketoisovaleric acid Methylmalonic acid Oxoglutaric acid Succinic acid 3-Methyl-2-oxovaleric acid L-Leucine Ketoleucine L-Valine
Arginine and Proline Metabolism	53	1.86	7	0.00173	0.163	0.034	Glycine Guanidoacetic acid L-Proline Oxoglutaric acid Succinic acid L-Arginine Citrulline
Alanine Metabolism	17	0.598	4	0.00221	0.206	0.0362	Glycine L-Alanine Oxoglutaric acid Pyruvic acid
Glutamate Metabolism	49	1.72	6	0.00571	0.525	0.0747	Glycine L-Alanine Oxoglutaric acid Pyruvic acid Succinic acid L-Glutamine
Aspartate Metabolism	35	1.23	5	0.00609	0.555	0.0747	Oxoglutaric acid L-Arginine L-Glutamine N-Acetyl-L-aspartic acid Citrulline
Glucose-Alanine Cycle	13	0.457	3	0.00896	0.807	0.0976	L-Alanine Oxoglutaric acid Pyruvic acid
Phenylalanine and Tyrosine Metabolism	28	0.984	4	0.0144	1	0.141	L-Tyrosine Phenylpyruvic acid Oxoglutaric acid 4-Hydroxyphenylpyruvic acid
Carnitine Synthesis	22	0.773	3	0.0388	1	0.346	Glycine Oxoglutaric acid Succinic acid
Oxidation of Branched Chain Fatty Acids	26	0.914	3	0.0595	1	0.486	L-Acetylcarnitine Oxoglutaric acid Succinic acid
Ketone Body Metabolism	13	0.457	2	0.0735	1	0.554	(R)-3-Hydroxybutyric acid Succinic acid
Citric Acid Cycle	32	1.12	3	0.0984	1	0.689	Oxoglutaric acid Pyruvic acid Succinic acid
Amino Sugar Metabolism	33	1.16	3	0.106	1	0.691	Pyruvic acid L-Glutamine D-Fructose
Beta Oxidation of Very Long Chain Fatty Acids	17	0.598	2	0.117	1	0.719	L-Acetylcarnitine Caproic acid
Methylhistidine Metabolism	4	0.141	1	0.134	1	0.769	L-Histidine
Warburg Effect	58	2.04	4	0.141	1	0.769	Oxoglutaric acid Pyruvic acid Succinic acid L-Glutamine
Glutathione Metabolism	21	0.738	2	0.166	1	0.858	Glycine L-Alanine
Propanoate Metabolism	42	1.48	3	0.18	1	0.881	Methylmalonic acid Oxoglutaric acid L-Valine
Methionine Metabolism	43	1.51	3	0.189	1	0.882	Glycine L-Serine L-Methionine
Cysteine Metabolism	26	0.914	2	0.231	1	0.986	Oxoglutaric acid Pyruvic acid
Phytanic Acid Peroxisomal Oxidation	26	0.914	2	0.231	1	0.986	Oxoglutaric acid Succinic acid
Selenoamino Acid Metabolism	28	0.984	2	0.258	1	1	L-Alanine L-Serine
Phenylacetate Metabolism	9	0.316	1	0.276	1	1	L-Glutamine
Homocysteine Degradation	9	0.316	1	0.276	1	1	L-Serine
Malate-Aspartate Shuttle	10	0.352	1	0.302	1	1	Oxoglutaric acid
Pyruvaldehyde Degradation	10	0.352	1	0.302	1	1	Pyruvic acid
Beta-Alanine Metabolism	34	1.2	2	0.338	1	1	L-Histidine Oxoglutaric acid
Phosphatidylethanolamine Biosynthesis	12	0.422	1	0.351	1	1	L-Serine
Gluconeogenesis	35	1.23	2	0.351	1	1	Oxoglutaric acid Pyruvic acid
Tryptophan Metabolism	60	2.11	3	0.354	1	1	L-Alanine Oxoglutaric acid L-Tryptophan
Thyroid hormone synthesis	13	0.457	1	0.374	1	1	L-Tyrosine
Vitamin K Metabolism	14	0.492	1	0.396	1	1	Methylmalonic acid
Bile Acid Biosynthesis	65	2.29	3	0.404	1	1	Glycine Glycocholic acid Chenodeoxycholic acid glycine conjugate
Tyrosine Metabolism	72	2.53	3	0.471	1	1	L-Tyrosine Oxoglutaric acid 4-Hydroxyphenylpyruvic acid
Spermidine and Spermine Biosynthesis	18	0.633	1	0.478	1	1	L-Methionine
Alpha Linolenic Acid and Linoleic Acid Metabolism	19	0.668	1	0.496	1	1	Arachidonic acid
Butyrate Metabolism	19	0.668	1	0.496	1	1	Succinic acid
Mitochondrial Electron Transport Chain	19	0.668	1	0.496	1	1	Succinic acid
Catecholamine Biosynthesis	20	0.703	1	0.515	1	1	L-Tyrosine
Betaine Metabolism	21	0.738	1	0.532	1	1	L-Methionine
Transfer of Acetyl Groups into Mitochondria	22	0.773	1	0.549	1	1	Pyruvic acid
Glycolysis	25	0.879	1	0.596	1	1	Pyruvic acid
Mitochondrial Beta-Oxidation of Short Chain Saturated Fatty Acids	27	0.949	1	0.624	1	1	Caproic acid
Lysine Degradation	30	1.05	1	0.664	1	1	Oxoglutaric acid
Starch and Sucrose Metabolism	31	1.09	1	0.676	1	1	D-Fructose
Fructose and Mannose Degradation	32	1.12	1	0.688	1	1	D-Fructose
Fatty Acid Biosynthesis	35	1.23	1	0.72	1	1	Caproic acid
Nicotinate and Nicotinamide Metabolism	37	1.3	1	0.74	1	1	L-Glutamine
Purine Metabolism	74	2.6	2	0.75	1	1	Glycine L-Glutamine
Galactose Metabolism	38	1.34	1	0.75	1	1	D-Fructose
Porphyrin Metabolism	40	1.41	1	0.768	1	1	Glycine
Sphingolipid Metabolism	40	1.41	1	0.768	1	1	L-Serine
Histidine Metabolism	43	1.51	1	0.792	1	1	L-Histidine
Pyruvate Metabolism	48	1.69	1	0.828	1	1	Pyruvic acid
Pyrimidine Metabolism	59	2.07	1	0.886	1	1	L-Glutamine
Arachidonic Acid Metabolism	69	2.43	1	0.922	1	1	Arachidonic acid

## Sheet: Predicted metabolite sets
	Total	Expected	Hits	Raw P	Holm P	FDR	Enriched_Compounds
pyruvate carboxylase	9	1.4	4	0.0349	1	1	L-Glutamine L-Proline Oxoglutaric acid Succinic acid
citrate synthase	7	1.09	3	0.0773	1	1	L-Glutamine L-Proline Oxoglutaric acid
N-acetylglucosamine-6-phosphate deacetylase	5	0.776	2	0.173	1	1	D-Fructose L-Glutamine
glucosamine-6-phosphate deaminase	6	0.931	2	0.235	1	1	D-Fructose L-Glutamine
2-oxoisovalerate dehydrogenase (acylating; 3-methyl-2-oxobutanoate), mitochondrial	2	0.31	1	0.287	1	1	L-Valine
3-amino-isobutyrate transport	2	0.31	1	0.287	1	1	L-Valine
3-amino-isobutyrate transport, mitochondrial	2	0.31	1	0.287	1	1	L-Valine
3-hydroxyacyl-CoA dehydratase (3-hydroxyisobutyryl-CoA) (mitochondria)	2	0.31	1	0.287	1	1	L-Valine
3-hydroxyisobutyrate dehydrogenase, mitochondrial	2	0.31	1	0.287	1	1	L-Valine
3-hydroxyisobutyryl-CoA hydrolase, mitochondrial	2	0.31	1	0.287	1	1	L-Valine
acyl-CoA dehydrogenase (isobutyryl-CoA), mitochondrial	2	0.31	1	0.287	1	1	L-Valine
L-3-Amino-isobutanoate exchange	2	0.31	1	0.287	1	1	L-Valine
L-3-aminoisobutyrate transaminase, mitochondrial	2	0.31	1	0.287	1	1	L-Valine
malonate-semialdehyde dehydrogenase (acetylating), mitochondrial	2	0.31	1	0.287	1	1	L-Valine
methylmalonate-semialdehyde dehydrogenase	2	0.31	1	0.287	1	1	L-Valine
H+ exchange	2	0.31	1	0.287	1	1	Oxoglutaric acid
formimidoyltransferase cyclodeaminase	2	0.31	1	0.287	1	1	L-Histidine
Glutamate formimidoyltransferase	2	0.31	1	0.287	1	1	L-Histidine
Histamine exchange	2	0.31	1	0.287	1	1	L-Histidine
histidase	2	0.31	1	0.287	1	1	L-Histidine
imidazolonepropionase	2	0.31	1	0.287	1	1	L-Histidine
urocanase	2	0.31	1	0.287	1	1	L-Histidine
3,4-Dihydroxy-L-phenylalanine exchange	2	0.31	1	0.287	1	1	L-Tyrosine
aldehyde dehydrogenase (phenylacetaldehyde, NAD)	2	0.31	1	0.287	1	1	L-Tyrosine
aldehyde dehydrogenase (phenylacetaldehyde, NADP)	2	0.31	1	0.287	1	1	L-Tyrosine
Tyramine O-sulfate exchange	2	0.31	1	0.287	1	1	L-Tyrosine
Tyramine O-sulfate transport (diffusion)	2	0.31	1	0.287	1	1	L-Tyrosine
Tyramine Sulfotransferase	2	0.31	1	0.287	1	1	L-Tyrosine
4-Hydroxyphenylacetaldehyde:NADP+ oxidoreductase	2	0.31	1	0.287	1	1	L-Tyrosine
4-Hydroxyphenylacetate exchange	2	0.31	1	0.287	1	1	L-Tyrosine
hydroxyphenylacetate transport via diffusion	2	0.31	1	0.287	1	1	L-Tyrosine
Tyramine:oxygen oxidoreductase(deaminating)(flavin-containing) (cytosol)	2	0.31	1	0.287	1	1	L-Tyrosine
L-carnitine transport out of mitochondria via diffusion	7	1.09	2	0.297	1	1	Chenodeoxycholic acid glycine conjugate Glycocholic acid
N-acetyl-glucosamine lysosomal efflux	8	1.24	2	0.36	1	1	D-Fructose L-Glutamine
N-acetylglucosamine kinase	8	1.24	2	0.36	1	1	D-Fructose L-Glutamine
methylmalonyl-CoA mutase	8	1.24	2	0.36	1	1	Chenodeoxycholic acid glycine conjugate Glycocholic acid
Propionyl-CoA carboxylase, mitochondrial	8	1.24	2	0.36	1	1	Chenodeoxycholic acid glycine conjugate Glycocholic acid
5-Hydroxy-L-tryptophan decarboxy-lyase	3	0.466	1	0.398	1	1	L-Tryptophan
5-Hydroxy-L-tryptophan exchange	3	0.466	1	0.398	1	1	L-Tryptophan
L-Tryptophan,tetrahydrobiopterin:oxygen oxidoreductase (5-hydroxylating)	3	0.466	1	0.398	1	1	L-Tryptophan
Serotonin exchange	3	0.466	1	0.398	1	1	L-Tryptophan
fatty-acyl-CoA elongation (n-C18:3CoA)	3	0.466	1	0.398	1	1	Arachidonic acid
alpha-N-Phenylacetyl-L-glutamine exchange	3	0.466	1	0.398	1	1	L-Tyrosine
L-Phenylalanine carboxy-lyase	3	0.466	1	0.398	1	1	L-Tyrosine
L-Tyrosine exchange	3	0.466	1	0.398	1	1	L-Tyrosine
PHEACGLN extracellular transport via diffusion	3	0.466	1	0.398	1	1	L-Tyrosine
Phenethylamine oxidase	3	0.466	1	0.398	1	1	L-Tyrosine
phenylacetate-CoA ligase	3	0.466	1	0.398	1	1	L-Tyrosine
Phenylacetyl-CoA:L-glutamine alpha-N-phenylacetyltransferase	3	0.466	1	0.398	1	1	L-Tyrosine
fatty acyl-CoA desaturase (n-C20:3CoA -> n-C20:4CoA)	3	0.466	1	0.398	1	1	Arachidonic acid
Succinate exchange	3	0.466	1	0.398	1	1	Succinic acid
2-deoxy-D-ribose 1-phosphate phosphorylase	3	0.466	1	0.398	1	1	Oxoglutaric acid
Deoxyribokinase	3	0.466	1	0.398	1	1	Oxoglutaric acid
deoxyribose-phosphate aldolase	3	0.466	1	0.398	1	1	Oxoglutaric acid
L-Tyrosine carboxy-lyase	3	0.466	1	0.398	1	1	L-Tyrosine
Tyrosine:dopa oxidase	3	0.466	1	0.398	1	1	L-Tyrosine
histidine decarboxylase	3	0.466	1	0.398	1	1	L-Histidine
intracellular transport	4	0.621	1	0.493	1	1	Arachidonic acid
Prostaglandin D2 exchange	4	0.621	1	0.493	1	1	Arachidonic acid
Prostaglandin-H2 D-isomerase [Precursor]	4	0.621	1	0.493	1	1	Arachidonic acid
Thromboxane A2 exchange	4	0.621	1	0.493	1	1	Arachidonic acid
Thromboxane-A synthase	4	0.621	1	0.493	1	1	Arachidonic acid
Prostaglandin G/H synthase	4	0.621	1	0.493	1	1	Arachidonic acid
methenyltetrahydrofolate cyclohydrolase	4	0.621	1	0.493	1	1	Glycine
H2O transport, lysosomal	5	0.776	1	0.573	1	1	D-Fructose
Iodide:hydrogen-peroxide oxidoreductase	5	0.776	1	0.573	1	1	L-Tyrosine
Iodide:hydrogen-peroxide oxidoreductase 2	5	0.776	1	0.573	1	1	L-Tyrosine
Vitamin D3 uptake	12	1.86	2	0.582	1	1	Chenodeoxycholic acid glycine conjugate Glycocholic acid
ATP transporter, peroxisomal	12	1.86	2	0.582	1	1	Chenodeoxycholic acid glycine conjugate Glycocholic acid
glyceraldehyde-3-phosphate dehydrogenase	19	2.95	3	0.592	1	1	L-Serine Glycine Oxoglutaric acid
O2 transport, endoplasmic reticulum	13	2.02	2	0.629	1	1	Chenodeoxycholic acid glycine conjugate Glycocholic acid
2-aminomuconate reductase	20	3.1	3	0.63	1	1	Chenodeoxycholic acid glycine conjugate Glycocholic acid L-Tryptophan
aminomuconate-semialdehyde dehydrogenase	20	3.1	3	0.63	1	1	Chenodeoxycholic acid glycine conjugate Glycocholic acid L-Tryptophan
picolinic acid decarboxylase	20	3.1	3	0.63	1	1	Chenodeoxycholic acid glycine conjugate Glycocholic acid L-Tryptophan
cystathionine beta-synthase	6	0.931	1	0.641	1	1	L-Methionine
cystathionine g-lyase	6	0.931	1	0.641	1	1	L-Methionine
enolase	6	0.931	1	0.641	1	1	Oxoglutaric acid
pyruvate kinase	6	0.931	1	0.641	1	1	Oxoglutaric acid
Glutamate transport via Na, H symport and K antiport	21	3.26	3	0.665	1	1	L-Glutamine Glycine Oxoglutaric acid
3-Hydroxy-L-kynurenine hydrolase	21	3.26	3	0.665	1	1	Chenodeoxycholic acid glycine conjugate Glycocholic acid L-Tryptophan
3-hydroxyanthranilate 3,4-dioxygenase	21	3.26	3	0.665	1	1	Chenodeoxycholic acid glycine conjugate Glycocholic acid L-Tryptophan
5-hydroxy-L-tryptophan secretion via secretory vesicle (ATP driven)	21	3.26	3	0.665	1	1	Chenodeoxycholic acid glycine conjugate Glycocholic acid L-Tryptophan
kynurenine 3-monooxygenase	21	3.26	3	0.665	1	1	Chenodeoxycholic acid glycine conjugate Glycocholic acid L-Tryptophan
L-Tryptophan:oxygen 2,3-oxidoreductase (decyclizing)	21	3.26	3	0.665	1	1	Chenodeoxycholic acid glycine conjugate Glycocholic acid L-Tryptophan
N-Formyl-L-kynurenine amidohydrolase	21	3.26	3	0.665	1	1	Chenodeoxycholic acid glycine conjugate Glycocholic acid L-Tryptophan
nicotinate-nucleotide diphosphorylase (carboxylating)	21	3.26	3	0.665	1	1	Chenodeoxycholic acid glycine conjugate Glycocholic acid L-Tryptophan
Quinolinate Synthase (Eukaryotic)	21	3.26	3	0.665	1	1	Chenodeoxycholic acid glycine conjugate Glycocholic acid L-Tryptophan
alpha-mannosidase, lysosomal	7	1.09	1	0.698	1	1	D-Fructose
beta-mannosidase, lysosomal	7	1.09	1	0.698	1	1	D-Fructose
DM Asn-X-Ser/Thr(ly)	7	1.09	1	0.698	1	1	D-Fructose
mannose efflux from lysosome	7	1.09	1	0.698	1	1	D-Fructose
ATP synthase (four protons for one ATP)	22	3.41	3	0.699	1	1	D-Fructose L-Serine Oxoglutaric acid
7-alpha,24(S)-Dihydroxycholesterol exchange	8	1.24	1	0.746	1	1	Chenodeoxycholic acid glycine conjugate
7-alpha,25-Dihydroxycholesterol exchange	8	1.24	1	0.746	1	1	Chenodeoxycholic acid glycine conjugate
7-alpha,27-Dihydroxycholesterol exchange	8	1.24	1	0.746	1	1	Chenodeoxycholic acid glycine conjugate
cholesterol 25-hydroxylase	8	1.24	1	0.746	1	1	Chenodeoxycholic acid glycine conjugate
cytochrome P450, family 46, subfamily A, polypeptide 1	8	1.24	1	0.746	1	1	Chenodeoxycholic acid glycine conjugate
oxysterol 7-alpha-hydroxylase	8	1.24	1	0.746	1	1	Chenodeoxycholic acid glycine conjugate
24 trihydroxy cholesterol transport	8	1.24	1	0.746	1	1	Chenodeoxycholic acid glycine conjugate
25 trihydroxy cholesterol transport	8	1.24	1	0.746	1	1	Chenodeoxycholic acid glycine conjugate
27 trihydroxy cholesterol transport	8	1.24	1	0.746	1	1	Chenodeoxycholic acid glycine conjugate
oxysterol 7alpha-hydroxylase	8	1.24	1	0.746	1	1	Chenodeoxycholic acid glycine conjugate
carnitine O-acetyltransferase, reverse direction, peroxisomal	8	1.24	1	0.746	1	1	Arachidonic acid
carnitine-acetylcarnitine carrier, peroxisomal	8	1.24	1	0.746	1	1	Arachidonic acid
acetyl-CoA carboxylase	17	2.64	2	0.777	1	1	Arachidonic acid Glycine
pyridoxal kinase	17	2.64	2	0.777	1	1	Chenodeoxycholic acid glycine conjugate Glycocholic acid
cysteinesulfinic acid oxidase	17	2.64	2	0.777	1	1	Chenodeoxycholic acid glycine conjugate Glycocholic acid
Hypotaurine oxidase	17	2.64	2	0.777	1	1	Chenodeoxycholic acid glycine conjugate Glycocholic acid
Iodide:hydrogen-peroxide oxidoreductase 4	25	3.88	3	0.784	1	1	Chenodeoxycholic acid glycine conjugate Glycocholic acid L-Tyrosine
L-Thyroxine exchange	25	3.88	3	0.784	1	1	Chenodeoxycholic acid glycine conjugate Glycocholic acid L-Tyrosine
NADP transporter, peroxisome	9	1.4	1	0.787	1	1	Glycocholic acid
NADPH transporter, peroxisome	9	1.4	1	0.787	1	1	Glycocholic acid
thioredoxin reductase (NADPH)	9	1.4	1	0.787	1	1	Oxoglutaric acid
Reduced glutathione exchange	18	2.79	2	0.805	1	1	Chenodeoxycholic acid glycine conjugate Glycocholic acid
L-Ascorbate exchange	18	2.79	2	0.805	1	1	Chenodeoxycholic acid glycine conjugate Glycocholic acid
glutamine synthetase	34	5.28	4	0.817	1	1	D-Fructose L-Glutamine L-Serine Glycine
Iodide:hydrogen-peroxide oxidoreductase 3	10	1.55	1	0.821	1	1	L-Tyrosine
Triiodothyronine exchange	10	1.55	1	0.821	1	1	L-Tyrosine
dehydroascorbate transport (uniport)	27	4.19	3	0.829	1	1	Chenodeoxycholic acid glycine conjugate Arachidonic acid Glycocholic acid
pyridoxal transport via diffusion	19	2.95	2	0.83	1	1	Chenodeoxycholic acid glycine conjugate Glycocholic acid
Arachidic acid exchange	19	2.95	2	0.83	1	1	Chenodeoxycholic acid glycine conjugate Glycocholic acid
Nitric Oxide Synthase (NO forming)	28	4.34	3	0.849	1	1	Chenodeoxycholic acid glycine conjugate Arachidonic acid Glycocholic acid
Tetrahydrobiopterin-4a-carbinolamine dehydratase	11	1.71	1	0.85	1	1	L-Tyrosine
L-Phenylalanine,tetrahydrobiopterin:oxygen oxidoreductase (4-hydroxylating)	11	1.71	1	0.85	1	1	L-Tyrosine
Glutathione:cystine oxidoreductase	20	3.1	2	0.852	1	1	Chenodeoxycholic acid glycine conjugate Glycocholic acid
Glutathione dehydrogenase (dehydroascorbate reductase)	29	4.5	3	0.867	1	1	Chenodeoxycholic acid glycine conjugate Arachidonic acid Glycocholic acid
phosphoglycerate dehydrogenase	23	3.57	2	0.904	1	1	L-Serine Glycine
phosphoserine phosphatase (L-serine)	23	3.57	2	0.904	1	1	L-Serine Glycine
phosphoserine transaminase	23	3.57	2	0.904	1	1	L-Serine Glycine
glutamine phosphoribosyldiphosphate amidotransferase	14	2.17	1	0.912	1	1	D-Fructose
phosphoribosylaminoimidazole carboxylase	14	2.17	1	0.912	1	1	D-Fructose
phosphoribosylaminoimidazole synthase	14	2.17	1	0.912	1	1	D-Fructose
phosphoribosylaminoimidazolecarboxamide formyltransferase	14	2.17	1	0.912	1	1	D-Fructose
phosphoribosylaminoimidazolesuccinocarboxamide synthase	14	2.17	1	0.912	1	1	D-Fructose
phosphoribosylformylglycinamidine synthase	14	2.17	1	0.912	1	1	D-Fructose
phosphoribosylglycinamide formyltransferase	14	2.17	1	0.912	1	1	D-Fructose
phosphoribosylglycinamide synthase	14	2.17	1	0.912	1	1	D-Fructose
adenylosuccinate lyase	14	2.17	1	0.912	1	1	D-Fructose
adenosylhomocysteinase	16	2.48	1	0.939	1	1	L-Methionine
methionine adenosyltransferase	16	2.48	1	0.939	1	1	L-Methionine
hydrogen peroxide transport via diffusion	35	5.43	3	0.94	1	1	Chenodeoxycholic acid glycine conjugate Arachidonic acid Glycocholic acid
o2 transport (diffusion)	35	5.43	3	0.94	1	1	Chenodeoxycholic acid glycine conjugate Arachidonic acid Glycocholic acid
glycine hydroxymethyltransferase, reversible	18	2.79	1	0.958	1	1	Glycine
dimethylallyltranstransferase	39	6.05	3	0.966	1	1	Chenodeoxycholic acid glycine conjugate Arachidonic acid Glycocholic acid
geranyltranstransferase	39	6.05	3	0.966	1	1	Chenodeoxycholic acid glycine conjugate Arachidonic acid Glycocholic acid
isopentenyl-diphosphate D-isomerase	39	6.05	3	0.966	1	1	Chenodeoxycholic acid glycine conjugate Arachidonic acid Glycocholic acid
Carbon monoxide exchange	39	6.05	3	0.966	1	1	Chenodeoxycholic acid glycine conjugate Arachidonic acid Glycocholic acid
CO transporter via diffusion	39	6.05	3	0.966	1	1	Chenodeoxycholic acid glycine conjugate Arachidonic acid Glycocholic acid
coproporphyrinogen oxidase (O2 required)	39	6.05	3	0.966	1	1	Chenodeoxycholic acid glycine conjugate Arachidonic acid Glycocholic acid
Ferrochelatase, mitochondrial	39	6.05	3	0.966	1	1	Chenodeoxycholic acid glycine conjugate Arachidonic acid Glycocholic acid
Heme oxygenase 1	39	6.05	3	0.966	1	1	Chenodeoxycholic acid glycine conjugate Arachidonic acid Glycocholic acid
Heme transport to cytosol	39	6.05	3	0.966	1	1	Chenodeoxycholic acid glycine conjugate Arachidonic acid Glycocholic acid
hydroxymethylbilane synthase	39	6.05	3	0.966	1	1	Chenodeoxycholic acid glycine conjugate Arachidonic acid Glycocholic acid
iron (II) transport	39	6.05	3	0.966	1	1	Chenodeoxycholic acid glycine conjugate Arachidonic acid Glycocholic acid
Nad(p)h biliverdin reductase	39	6.05	3	0.966	1	1	Chenodeoxycholic acid glycine conjugate Arachidonic acid Glycocholic acid
protoporphyrinogen IX mitochondrial transport	39	6.05	3	0.966	1	1	Chenodeoxycholic acid glycine conjugate Arachidonic acid Glycocholic acid
uroporphyrinogen decarboxylase (uroporphyrinogen III)	39	6.05	3	0.966	1	1	Chenodeoxycholic acid glycine conjugate Arachidonic acid Glycocholic acid
uroporphyrinogen-III synthase	39	6.05	3	0.966	1	1	Chenodeoxycholic acid glycine conjugate Arachidonic acid Glycocholic acid
taurine transport (sodium symport) (2:1)	40	6.21	3	0.971	1	1	Chenodeoxycholic acid glycine conjugate Arachidonic acid Glycocholic acid
glycochenodeoxycholate exchange	41	6.36	3	0.975	1	1	Chenodeoxycholic acid glycine conjugate Arachidonic acid Glycocholic acid
carnitine O-aceyltransferase, mitochondrial	42	6.52	3	0.979	1	1	Chenodeoxycholic acid glycine conjugate Arachidonic acid Glycocholic acid
carnitine O-aceyltransferase, peroxisomal	42	6.52	3	0.979	1	1	Chenodeoxycholic acid glycine conjugate Arachidonic acid Glycocholic acid
carnitine-propcarnitine carrier, peroxisomal	42	6.52	3	0.979	1	1	Chenodeoxycholic acid glycine conjugate Arachidonic acid Glycocholic acid
cytochrome P450, family 7, subfamily A, polypeptide 1	42	6.52	3	0.979	1	1	Chenodeoxycholic acid glycine conjugate Arachidonic acid Glycocholic acid
taurine transport (sodium symport) (cytosol to peroxisome)	42	6.52	3	0.979	1	1	Chenodeoxycholic acid glycine conjugate Arachidonic acid Glycocholic acid
taurochenodeoxycholate exchange	42	6.52	3	0.979	1	1	Chenodeoxycholic acid glycine conjugate Arachidonic acid Glycocholic acid
transport into the mitochondria from cytosol (carnitine)	42	6.52	3	0.979	1	1	Chenodeoxycholic acid glycine conjugate Arachidonic acid Glycocholic acid
Cytochrome P450 27	42	6.52	3	0.979	1	1	Chenodeoxycholic acid glycine conjugate Arachidonic acid Glycocholic acid
5-beta-cytochrome P450, family 27, subfamily A, polypeptide 1	42	6.52	3	0.979	1	1	Chenodeoxycholic acid glycine conjugate Arachidonic acid Glycocholic acid
fatty acid intracellular transport	42	6.52	3	0.979	1	1	Arachidonic acid Chenodeoxycholic acid glycine conjugate Glycocholic acid
carboxylic acid dissociation	22	3.41	1	0.98	1	1	Glycine
fatty acid transport via diffusion	22	3.41	1	0.98	1	1	Arachidonic acid
Proline dehydrogenase	34	5.28	2	0.983	1	1	Chenodeoxycholic acid glycine conjugate Arachidonic acid
phosphoribosylpyrophosphate synthetase	23	3.57	1	0.983	1	1	D-Fructose
alpha-methylacyl-CoA racemase	44	6.83	3	0.984	1	1	Chenodeoxycholic acid glycine conjugate Arachidonic acid Glycocholic acid
alpha-methylacyl-CoA racemase (reductase)	44	6.83	3	0.984	1	1	Chenodeoxycholic acid glycine conjugate Arachidonic acid Glycocholic acid
Chenodeoxyglycocholate exchange	44	6.83	3	0.984	1	1	Chenodeoxycholic acid glycine conjugate Arachidonic acid Glycocholic acid
FADH2 transporter, peroxisomal	44	6.83	3	0.984	1	1	Chenodeoxycholic acid glycine conjugate Arachidonic acid Glycocholic acid
glycocholate exchange	44	6.83	3	0.984	1	1	Chenodeoxycholic acid glycine conjugate Arachidonic acid Glycocholic acid
Taurocholic acid exchange	44	6.83	3	0.984	1	1	Chenodeoxycholic acid glycine conjugate Arachidonic acid Glycocholic acid
acyl-Coenzyme A oxidase 2, branched chain	44	6.83	3	0.984	1	1	Chenodeoxycholic acid glycine conjugate Arachidonic acid Glycocholic acid
hydroxysteroid (17-beta) dehydrogenase 4	44	6.83	3	0.984	1	1	Chenodeoxycholic acid glycine conjugate Arachidonic acid Glycocholic acid
5-beta-cholestane-3-alpha,7-alpha,12-alpha-triol 27-hydroxylase	44	6.83	3	0.984	1	1	Chenodeoxycholic acid glycine conjugate Arachidonic acid Glycocholic acid
3-beta-hydroxysteroid-delta(8),delta(7)-isomerase	44	6.83	3	0.984	1	1	Chenodeoxycholic acid glycine conjugate Arachidonic acid Glycocholic acid
C-3 sterol dehydrogenase (4-methylzymosterol)	44	6.83	3	0.984	1	1	Chenodeoxycholic acid glycine conjugate Arachidonic acid Glycocholic acid
C-4 methyl sterol oxidase	44	6.83	3	0.984	1	1	Chenodeoxycholic acid glycine conjugate Arachidonic acid Glycocholic acid
fatty-acid--CoA ligase	24	3.72	1	0.986	1	1	Arachidonic acid
peroxisomal thiolase 2	45	6.98	3	0.987	1	1	Chenodeoxycholic acid glycine conjugate Arachidonic acid Glycocholic acid
bile acid intracellular transport	45	6.98	3	0.987	1	1	Chenodeoxycholic acid glycine conjugate Arachidonic acid Glycocholic acid
aldo-keto reductase family 1, member C4 (chlordecone reductase; 3-alpha hydroxysteroid dehydrogenase, type I; dihydrodiol dehydrogenase 4)	45	6.98	3	0.987	1	1	Chenodeoxycholic acid glycine conjugate Arachidonic acid Glycocholic acid
aldo-keto reductase family 1, member D1 (delta 4-3-ketosteroid-5-beta-reductase)	45	6.98	3	0.987	1	1	Chenodeoxycholic acid glycine conjugate Arachidonic acid Glycocholic acid
Very-long-chain-fatty-acid-CoA ligase	45	6.98	3	0.987	1	1	Chenodeoxycholic acid glycine conjugate Arachidonic acid Glycocholic acid
bile acid Coenzyme A: amino acid N-acyltransferase	45	6.98	3	0.987	1	1	Chenodeoxycholic acid glycine conjugate Arachidonic acid Glycocholic acid
24-dehydrocholesterol reductase [Precursor]	46	7.14	3	0.989	1	1	Chenodeoxycholic acid glycine conjugate Arachidonic acid Glycocholic acid
Lathosterol oxidase	46	7.14	3	0.989	1	1	Chenodeoxycholic acid glycine conjugate Arachidonic acid Glycocholic acid
dihydroceramide desaturase	38	5.9	2	0.992	1	1	Chenodeoxycholic acid glycine conjugate Arachidonic acid
C-14 sterol reductase	49	7.6	3	0.993	1	1	Chenodeoxycholic acid glycine conjugate Arachidonic acid Glycocholic acid
C-3 sterol keto reductase (zymosterol)	49	7.6	3	0.993	1	1	Chenodeoxycholic acid glycine conjugate Arachidonic acid Glycocholic acid
C-4 sterol methyl oxidase (4,4-dimethylzymosterol)	49	7.6	3	0.993	1	1	Chenodeoxycholic acid glycine conjugate Arachidonic acid Glycocholic acid
cholesterol precursor intracellular transport	49	7.6	3	0.993	1	1	Chenodeoxycholic acid glycine conjugate Arachidonic acid Glycocholic acid
cytochrome P450 lanosterol 14-alpha-demethylase	49	7.6	3	0.993	1	1	Chenodeoxycholic acid glycine conjugate Arachidonic acid Glycocholic acid
FAD transporter, endoplasmic reticulum	49	7.6	3	0.993	1	1	Chenodeoxycholic acid glycine conjugate Arachidonic acid Glycocholic acid
FADH2 transporter, endoplasmic reticulum	49	7.6	3	0.993	1	1	Chenodeoxycholic acid glycine conjugate Arachidonic acid Glycocholic acid
lanosterol synthase	49	7.6	3	0.993	1	1	Chenodeoxycholic acid glycine conjugate Arachidonic acid Glycocholic acid
Previtamin D3 formation	49	7.6	3	0.993	1	1	Chenodeoxycholic acid glycine conjugate Arachidonic acid Glycocholic acid
Squalene epoxidase, endoplasmic reticular (NADP)	49	7.6	3	0.993	1	1	Chenodeoxycholic acid glycine conjugate Arachidonic acid Glycocholic acid
Squalene synthase	49	7.6	3	0.993	1	1	Chenodeoxycholic acid glycine conjugate Arachidonic acid Glycocholic acid
Vitamin D3 exchange	49	7.6	3	0.993	1	1	Chenodeoxycholic acid glycine conjugate Arachidonic acid Glycocholic acid
Vitamin D3 formation	49	7.6	3	0.993	1	1	Chenodeoxycholic acid glycine conjugate Arachidonic acid Glycocholic acid
7-dehydrocholesterol reductase	50	7.76	3	0.994	1	1	Chenodeoxycholic acid glycine conjugate Arachidonic acid Glycocholic acid
sterol 12-alpha-hydroxylase	42	6.52	2	0.996	1	1	Chenodeoxycholic acid glycine conjugate Arachidonic acid
sterol 12-alpha-hydroxylase (nadh)	42	6.52	2	0.996	1	1	Chenodeoxycholic acid glycine conjugate Arachidonic acid
Beta oxidation of long chain fatty acid	52	8.07	3	0.996	1	1	Chenodeoxycholic acid glycine conjugate Arachidonic acid Glycocholic acid
protoporphyrinogen oxidase, mitochondrial	53	8.22	3	0.997	1	1	Chenodeoxycholic acid glycine conjugate Arachidonic acid Glycocholic acid
hydroxy-delta-5-steroid dehydrogenase, 3 beta- and steroid delta-isomerase 7	37	5.74	1	0.999	1	1	Arachidonic acid
L-Phenylalanine exchange	73	11.3	4	1	1	1	Chenodeoxycholic acid glycine conjugate L-Glutamine Glycocholic acid L-Tyrosine
Trehalose exchange	100	15.5	6	1	1	1	D-Fructose Chenodeoxycholic acid glycine conjugate L-Glutamine L-Serine Glycocholic acid Oxoglutaric acid
FAD transporter, peroxisomal	70	10.9	1	1	1	1	Chenodeoxycholic acid glycine conjugate
lipid, flip-flop intracellular transport	98	15.2	3	1	1	1	Chenodeoxycholic acid glycine conjugate Arachidonic acid Glycocholic acid
